# Supplementary material for: Establishment of Efficient Genetic Transformation Systems and Application of CRISPR/Cas9 Genome Editing Technology in Lilium pumilum DC. Fisch. and Lilium longiflorum White Heaven
Source: PubMed Central journal article supplement (PMC6627044; doi:10.3390/ijms20122920), 2019-06-14
Supplement: ijms-20-02920-s001.pdf [file ijms-20-02920-s001.pdf]

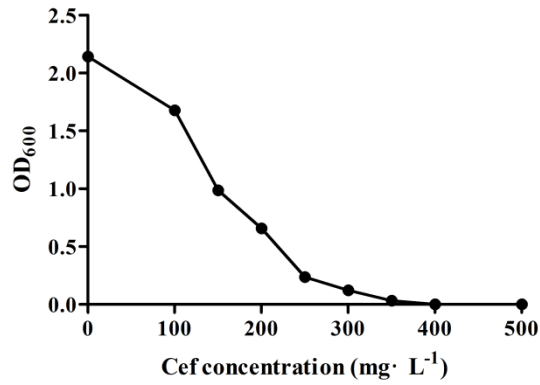

Figure S1. Influence of Cef on *Agrobacterium* EHA105

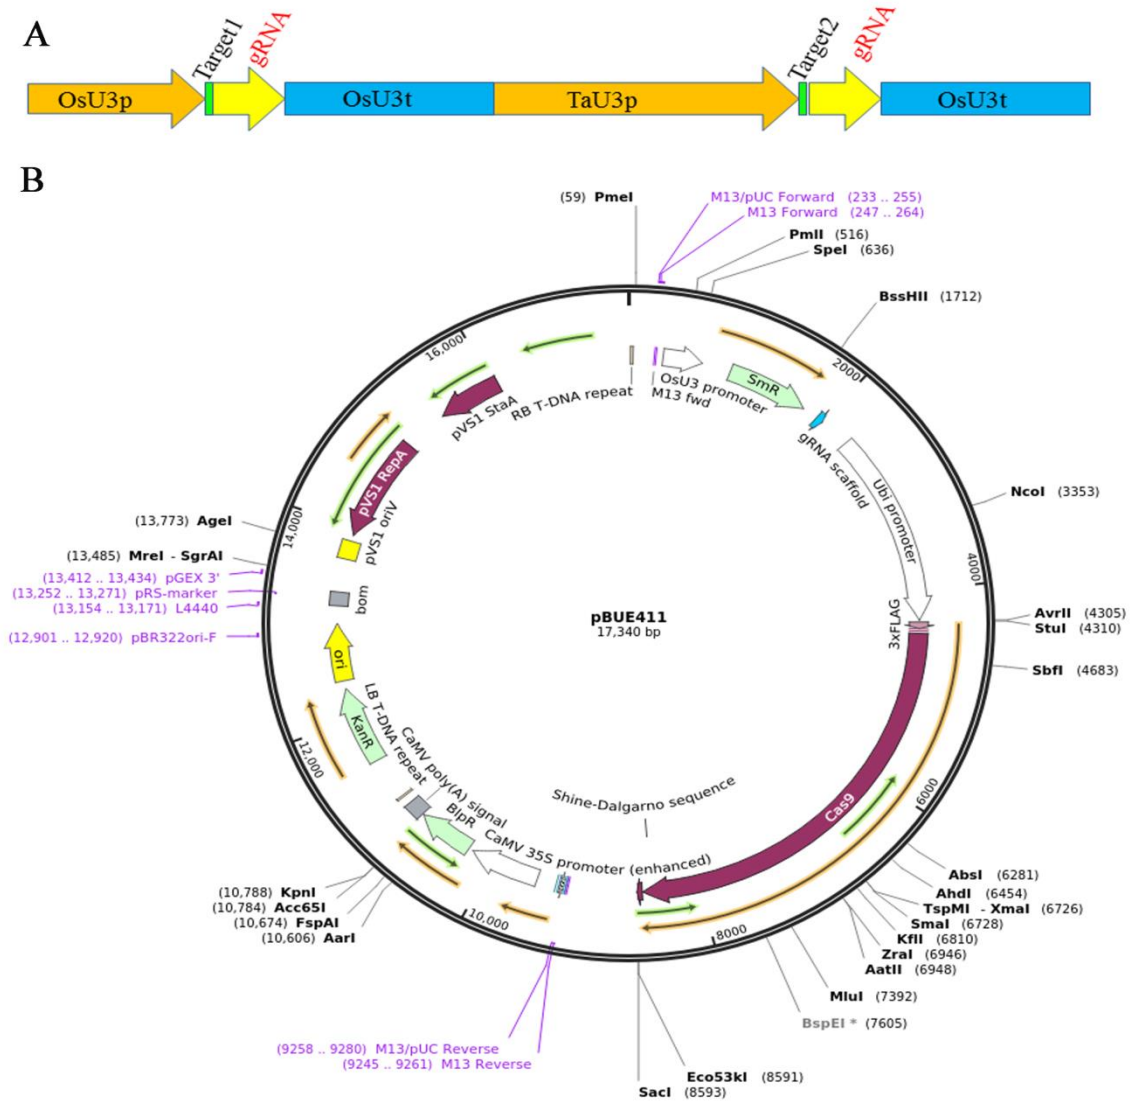

### C Sequence for LPPDS

```

GTCCTTCCTCGGTGGAATCAAGCGTTCGCCGACTCGCCGACCCTATCCCGCCCGTCTGTGCGTACCTCCACC
AGAATCCTTTCCACTGATCCCCCACC AATTTCTCTCTCTAAAAC TCCAAAACCCCACTAAGGGACTCACAAA
TTCGATCCTCAACAATCGGTTCTCTTCGTCATGA ACTCCGCCGATCGATCTCCACGTTTGCCATCACCGGC
AGGTATCCAAGATCTTCCATCAGTAGCTACTGATAGCATCAATTCAGCTCGAGAGCGCTTCAATTCATGGCG
CGGAGACGACATTGACGCGGAGAGTCGCCGTCCTTGCAGGTTGTTTGCAAGGATTGTCCGAGGCCGCGAGC

```

TCGATATACGGTGAATTTTCTTGAAGCGGCTAAGTTGTCGGCCTGAGTTTCGGAGTCGTGCAAGACAGGAGAA  
GCCGCTGCCAAGTTGTGATTGCCGGGGCCAGGTCTGGCGGGTTTATCTACGGCCAAGTATCTTGCCGATGCA  
GGACATATACCTATACTGTTGGAGGGGAGAGATGTTTGGGTGGAAAAGATTGCTGCATGGAAGGATAGTGATGG  
AGATTGGTATGAG**ACAGGCCTCCATATATTCTT**TGGAGCTTATCCCAATGTGCAGAATTTGTTTGGGG  
AACTTGGTATTAATGATCGTTTGCAGTGGAAAGGAGCACTCTATGATTTTGCAATGCCAAACAAGCCAGGAGAA  
TTTAGCCGCTTTGATTTTCCAGAGGTTCTTCCGACCCCTTAAATGGAATATGGGCCATCTTAAAGAATAATG  
AAATGCTGACCTGGCCAGAAAAAGTGCCTTTTGCATA**GGCCTTCTACCTGCTATGAT**TGGGGGACAG  
GCCTATGTTGAGGCTCAGGATGGTTAACTGTTAAAGAGTGGATGAGGAAGCAGGGCGTTCCTGAACGTGTCA  
ATGACGAAGTTTTCATTGCAATGTCCAAAGCTCTTAATTTTATAAATCCAGATGAGCTTTCATGCAGTGCAT  
TTTAATTGCTTTAAACCGTTTTCTTCAGGAAAAGCATGGCTCCAAGATGGCTTTCTTAGATGGTAATCCCCC  
GAGAGGTTGTGCATACCAATTGTTGACCACATTCAATCATTGGGTGGTCAAGTCCACTTAACTCTCGTATAC  
AGAAAATTGAGTTGAATTCTGATAGTACTGTGAAAAACCTTATACTGAGCAATGGGAAAATAATCAATGGAGA  
TGTTTATGTAATGACTACTCCTGTTGATGTCTTGAAGCTTCTTTGCTCAAGAAATGGAGAGAAAATTCATAC  
TTCAAGAAATTGGATAAATTGGTGGGAGTTCCTGTGATCAATGTTTCATATATGTTTGACAGGAAACTGAAGA  
ACACCTATGATCATCTTCTTTTTCAGCAGGAGTCCCTCTTTTGGAGTGTATGCAGATATGTCTGTAACCTGCAA  
GGAATATTACGATCCTTATCGTTCTATGCTTGGATTTCGCACCGGCAGAGGAATGGATCTCACGTAGT  
GACGATGAGATCATCGATGCTACAATGACAGAAGTCTAAGCTGTCCCAGATGAAATAGCCGCAGATCAGAG  
TAAAGCGAAAATCTCAAGTATCATGTTGTCAAACCTCCAAGATCTGTTTACAAAACCTGTGCCCGACTGTGAA  
CCGTGCCGGCCTCTGCAAGATCGCAATTGAAGGGTCTATCTGGCTGGCGATTACACGAAGCAGAAGTACTT  
GGCTTCGATGGAGGGGGCTGTTTGTCTGGGAAGCTTTGTGCGCAGTCTATTGTACAGGATTACGACATTTTA  
GTTGATCGGACGAAGAGAAGCCCTCAAGCCGAGATGTCAGTCGTC**TAG**TTGCCGGAATTTGGAGTCATAGCAGA  
CATCTTTGCTATACAATGTATTCTTTGCGTGCTGAGAAAATCAGATCTCAGAATATATACATTAATAAATGGT  
AGATTTTCTCTGAGTGGGTTAGAGCATGTCACCCATTGGATTATATCGTAGATATGAAATATTTGAAGCAA  
TTACAATTACATACATGTCGAT

**Figure S2.** *LpPDS* CRISPR / Cas9 targeted vectors. **A** is a schematic representation of the integration of two targets into two gRNA expression cassettes. **B** is a map of the gene editing vector pBUE411. **C** is the reference sequence for *LpPDS*, with the target highlighted in yellow and red font showing the PAM sequence.
